# Supplementary material for: Mathematical modelling of the most effective goal of cholesterol-lowering treatment in primary prevention
Source: HighWire-hosted journal article supplement (doi:10.1136/bmjopen-2021-050266), 2022-05-01
Supplement: bmjopen-2021-050266supp001_data_supplement.pdf [file bmjopen-2021-050266supp001_data_supplement.pdf]

## Supplementary tables 1a-c

**a. Data for figure 1a (ASCVD risk 7.5% 10<sup>-1</sup> years)**

| Target                | NNT                                    |     |    |    |
|-----------------------|----------------------------------------|-----|----|----|
|                       | Pre-treatment LDL cholesterol (mmol/l) |     |    |    |
|                       | 2                                      | 3   | 4  | 5  |
| LDLc 2.6 (100)        | ∞                                      | 141 | 45 | 30 |
| LDLc 1.8 (70)         | 278                                    | 52  | 32 | 24 |
| Non-HDLc -40%         | 74                                     | 52  | 41 | 34 |
| LDLc 1.8 (70) or -50% | 61                                     | 43  | 32 | 24 |

**b. Data for figure 1b (ASCVD risk 15% 10<sup>-1</sup> years)**

| Target                | NNT                                    |    |    |    |
|-----------------------|----------------------------------------|----|----|----|
|                       | Pre-treatment LDL cholesterol (mmol/l) |    |    |    |
|                       | 2                                      | 3  | 4  | 5  |
| LDLc 2.6 (100)        | ∞                                      | 70 | 23 | 15 |
| LDLc 1.8 (70)         | 137                                    | 26 | 16 | 12 |
| Non-HDLc -40%         | 37                                     | 26 | 20 | 17 |
| LDLc 1.8 (70) or -50% | 30                                     | 21 | 16 | 12 |

**c. Data for figure 1c (ASCVD risk 30% 10<sup>-1</sup> years)**

| Target                | NNT                                    |    |    |   |
|-----------------------|----------------------------------------|----|----|---|
|                       | Pre-treatment LDL cholesterol (mmol/l) |    |    |   |
|                       | 2                                      | 3  | 4  | 5 |
| LDLc 2.6 (100)        | ∞                                      | 35 | 11 | 7 |
| LDLc 1.8 (70)         | 69                                     | 13 | 8  | 6 |
| Non-HDLc -40%         | 18                                     | 13 | 10 | 9 |
| LDLc 1.8 (70) or -50% | 15                                     | 11 | 8  | 6 |
